# Supplementary material for: Graphic Warning Labels Affect Hypothetical Cigarette Purchasing Behavior among Smokers Living with HIV
Source: MDPI journal article supplement (doi:10.3390/ijerph16183380), 2019-09-12

**Supplemental Figure 1.** Screenshots of graphic warning labels (GWLs)

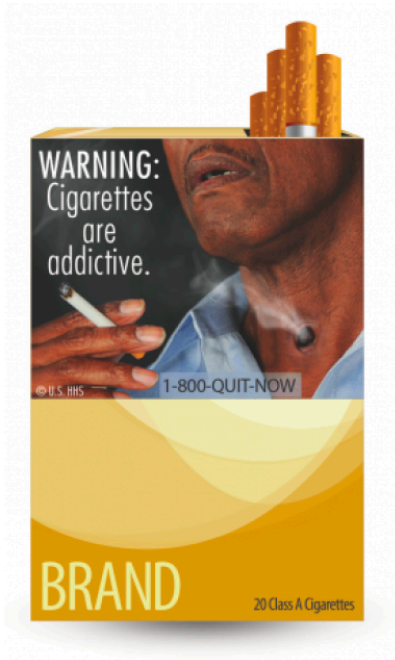

**\$7.00**

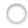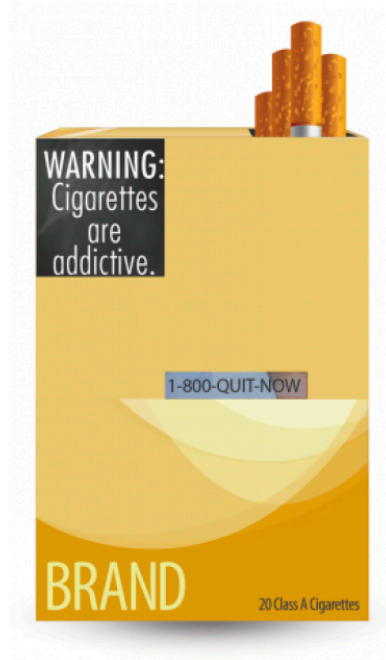

**\$3.50**

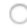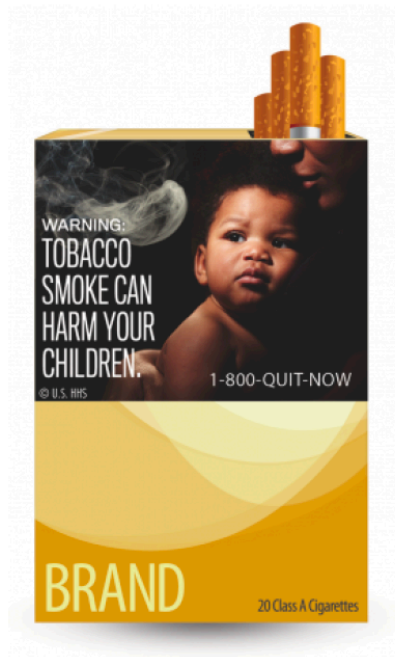

**\$7.00**

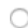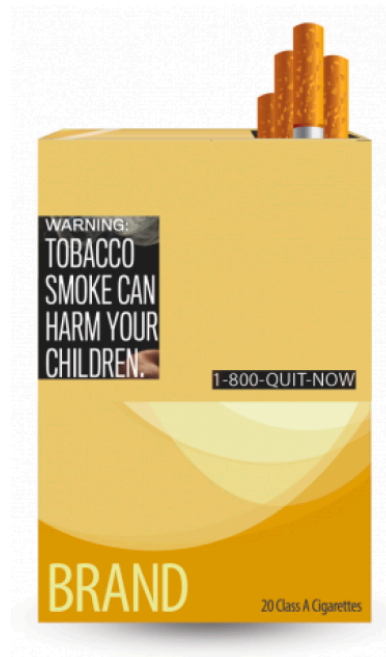

**\$3.50**

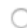

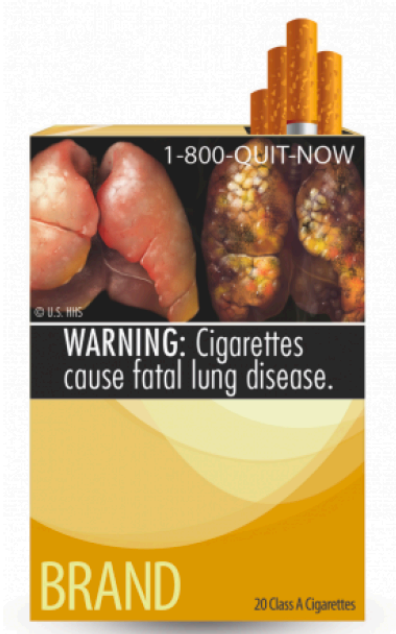

**\$7.00**

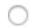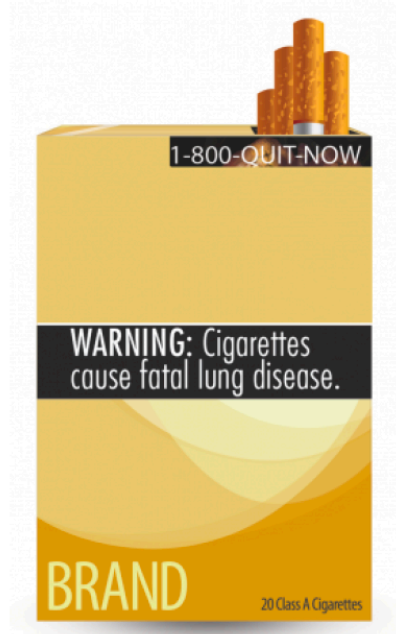

**\$3.50**

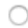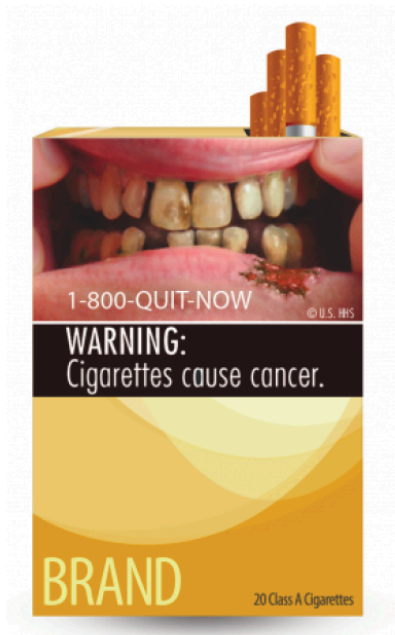

**\$7.00**

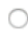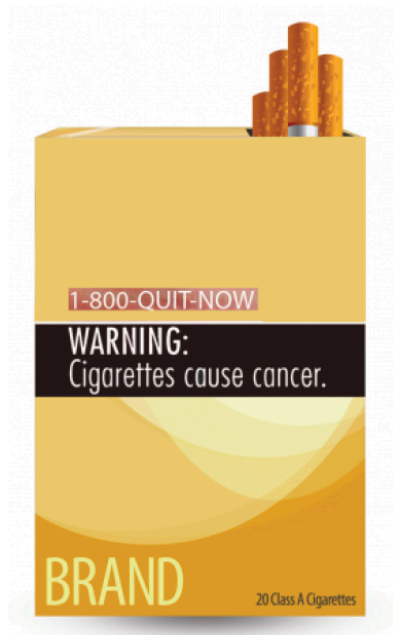

**\$3.50**

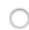

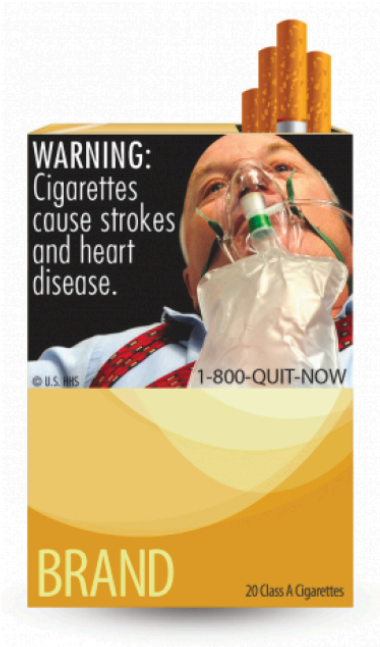

**\$7.00**

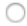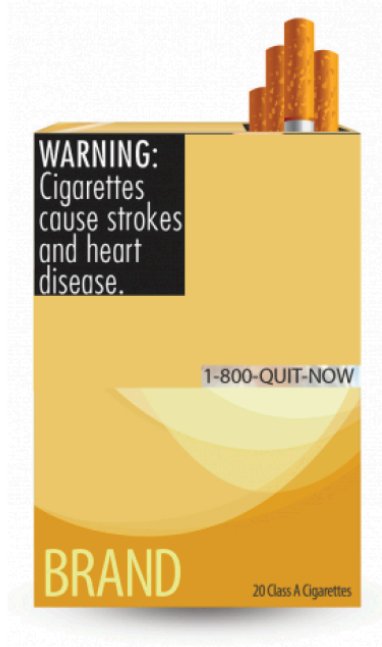

**\$3.50**

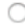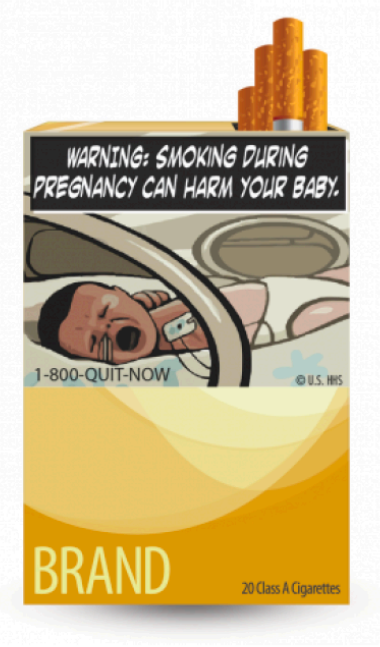

**\$7.00**

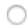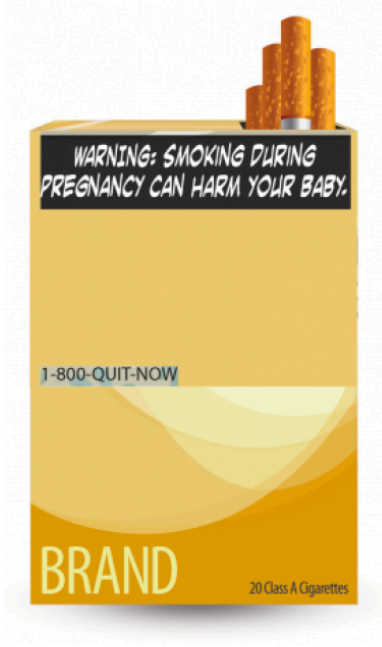

**\$3.50**

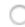

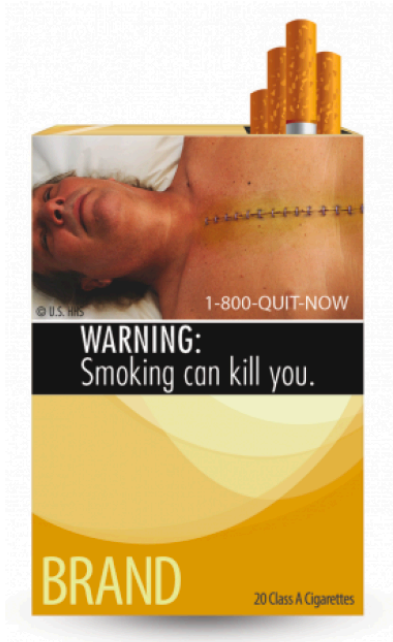

**\$7.00**

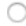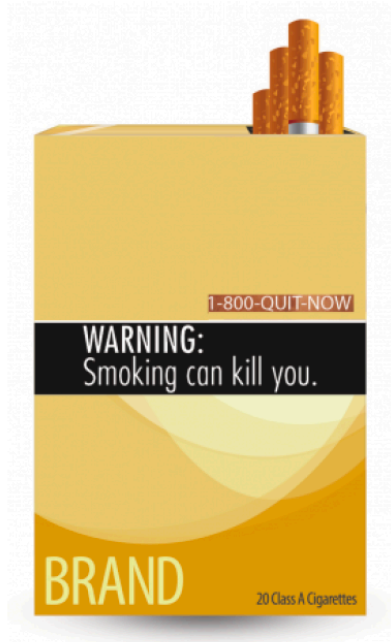

**\$3.50**

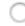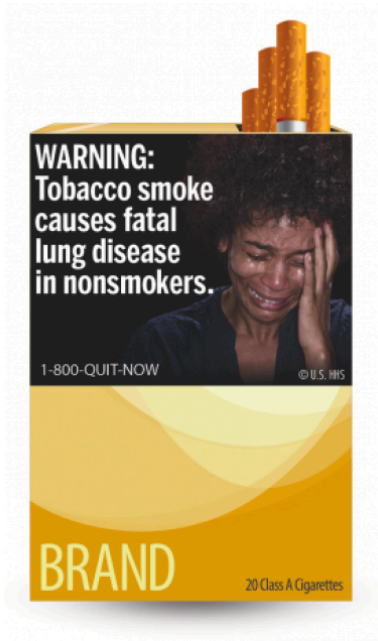

**\$7.00**

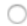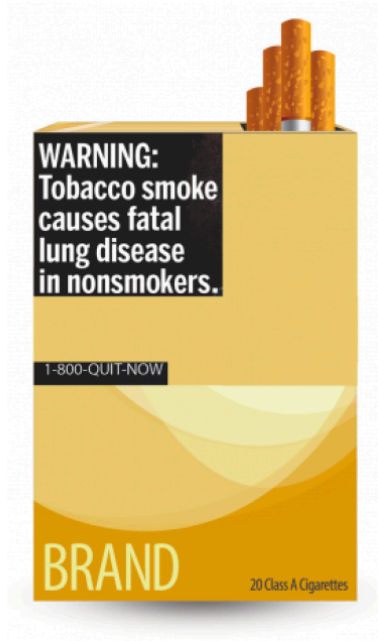

**\$3.50**

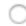

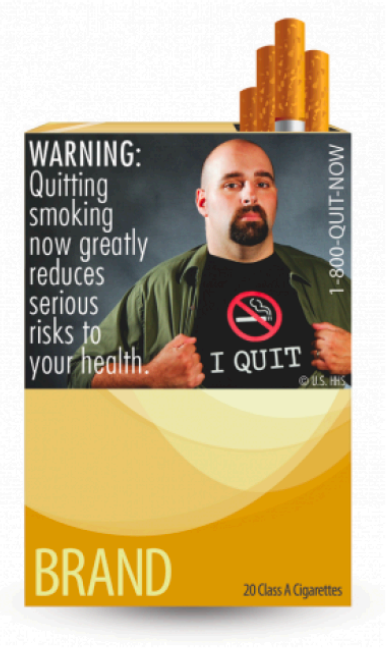

**\$7.00**

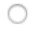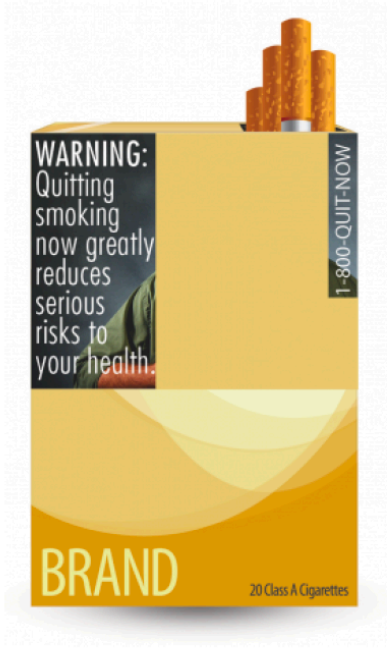

**\$3.50**

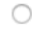

Supplement: s1 [file s1]
